# Supplementary material for: Semiconducting organic–inorganic nanocomposites by intimately tethering conjugated polymers to inorganic tetrapods
Source: Royal Society of Chemistry journal article supplement (doi:10.1039/c6nr00269b), 2016-01-01
Supplement: c6nr00269b1.pdf [file c6nr00269b1.pdf]

## Supporting Information

# Semiconducting Organic-Inorganic Nanocomposites by Intimately Tethering Conjugated Polymers to Inorganic Tetrapods

*Jaehan Jung, Young Jun Yoon, and Zhiqun Lin\**

School of Materials Science and Engineering, Georgia Institute of Technology, Atlanta, GA  
30332, USA

\* To whom the correspondence should be addressed; Email: [zhiqun.lin@mse.gatech.edu](mailto:zhiqun.lin@mse.gatech.edu)

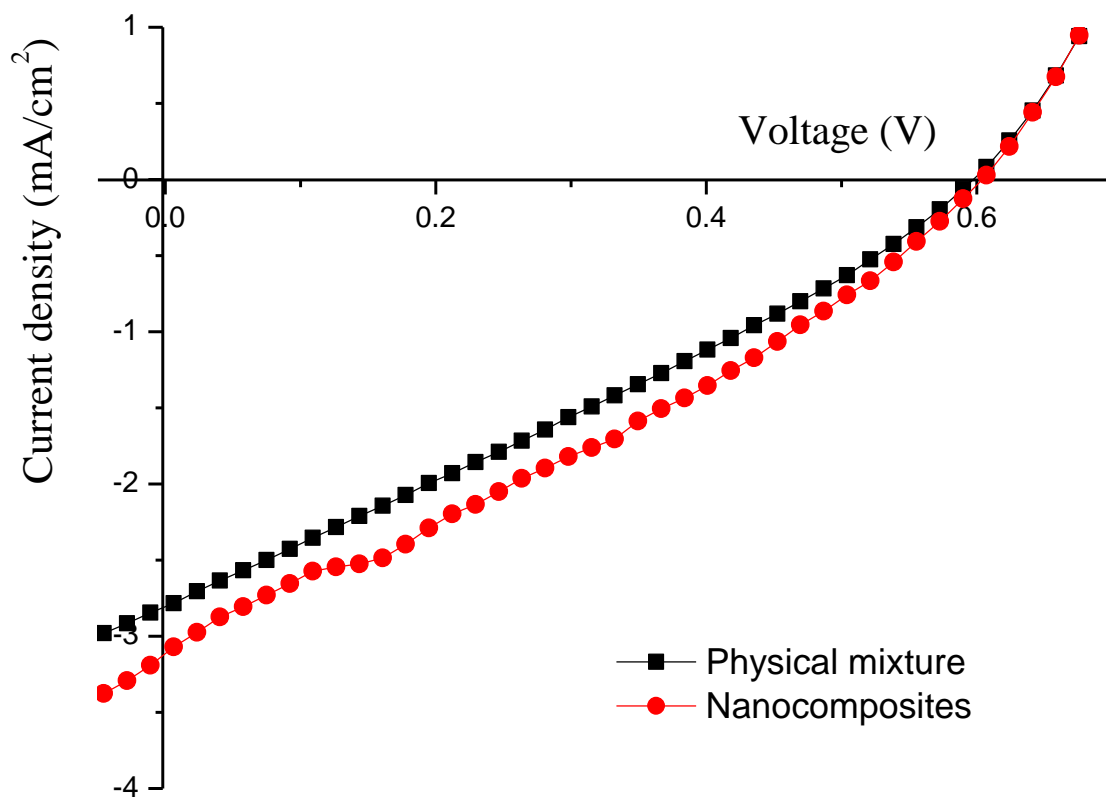

**Figure S1.** Current-voltage characteristics of hybrid solar cells composed of P3HT-CdSe tetrapod nanocomposites (red circles) and P3HT/CdSe tetrapods physical mixture (black squares). The weight fraction of CdSe tetrapods was 80% and the size of tetrapod was 16 nm. P3HT-CdSe tetrapod nanocomposites-based solar cell shows an improved *PCE* of 0.568% with a  $V_{oc}$  of 0.604 V, a  $J_{sc}$  of 3.07 mA/cm<sup>2</sup>, a *FF* of 0.305 compared to the corresponding physical mixture (a *PCE* of 0.472% with a  $V_{oc}$  of 0.607 V, a  $J_{sc}$  of 2.78 mA/cm<sup>2</sup>, a *FF* of 0.279). P3HT-CdSe tetrapod nanocomposites were synthesized using 4-azidobenzoic acid and P3HT/CdSe tetrapods physical mixture was prepared using butylamine-capped CdSe tetrapods via ligand exchange with pyridine.

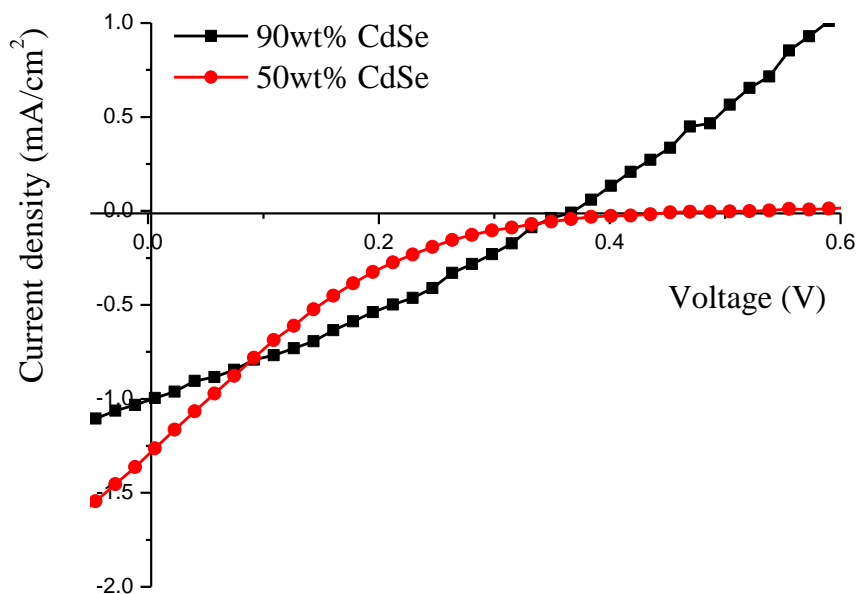

**Figure S2.** Current-voltage characteristics of hybrid solar cells composed of P3HT-CdSe tetrapod nanocomposites with the weight fraction of CdSe tetrapods of 50wt% and 90wt%, respectively, as the photoactive layer. Nanocomposites were synthesized by employing 4-azidobenzoic acid. The low performance of the device containing 50wt% CdSe tetrapods (a PCE of 0.077% with a  $J_{SC}$  of 1.26 mA/cm<sup>2</sup>, a  $V_{OC}$  of 0.538V, and a  $FF$  of 0.113) regardless of a smooth film (**Figure S3**) suggested the necessity of higher CdSe tetrapod weight fraction for enhanced device performance. Moreover, the devices fabricated using 90wt% CdSe tetrapods showed poor performance (a PCE of 0.1 % with a  $V_{OC}$  of 0.384V, a  $J_{SC}$  of 0.996 mA/cm<sup>2</sup>, and a  $FF$  of 0.278) due to the large roughness of film (**Figure S3**).

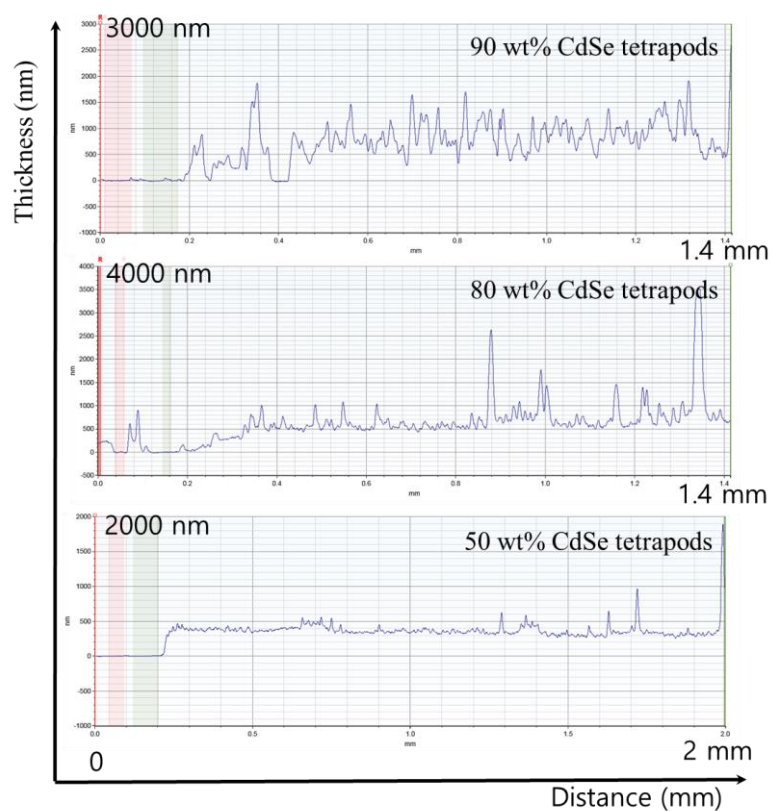

**Figure S3.** Height profiles of the films prepared using P3HT-CdSe tetrapod nanocomposites with the CdSe tetrapod weight fraction of 50%, 80%, and 90%, respectively, as measured by profilometer.
